# Supplementary material
Source: PubMed Central journal article supplement (PMC4667127)
Supplement: mmc1.pdf [file mmc1.pdf]

The American Journal of Human Genetics

Supplemental Data

**Dominant Genetic Variation and Missing Heritability  
for Human Complex Traits: Insights from Twin  
versus Genome-wide Common SNP Models**

Xu Chen, Ralf Kuja-Halkola, Iffat Rahman, Johannes Arpegård, Alexander Viktorin,  
Robert Karlsson, Sara Hägg, Per Svensson, Nancy L. Pedersen, and Patrik K.E.  
Magnusson

**Table S1. General characteristics of study participants**

|                                | All        | Gender     |            | Zygosity <sup>b</sup> |            |            |
|--------------------------------|------------|------------|------------|-----------------------|------------|------------|
|                                |            | Male       | Female     | MZ                    | SSDZ       | OSDZ       |
| <b>Phenotypes</b>              |            |            |            |                       |            |            |
| <b>n<sub>total</sub></b>       | 10682      | 5074       | 5608       | 2499                  | 4154       | 4029       |
| <b>Age<sup>a</sup></b>         | 64.89±8.08 | 65.45±7.99 | 64.38±8.13 | 63.67±7.49            | 65.45±8.47 | 65.06±7.95 |
| <b>n<sub>pair-match</sub></b>  | 7740       | 3653       | 4087       | 2176                  | 2886       | 2678       |
| <b>Age</b>                     | 65.03±7.75 | 65.58±7.69 | 64.54±7.77 | 63.54±7.31            | 65.63±8.09 | 65.60±7.56 |
| <b>Genotypes</b>               |            |            |            |                       |            |            |
| <b>n<sub>pheno-match</sub></b> | 9606       | 4523       | 5083       | 1423                  | 4154       | 4029       |
| <b>Age</b>                     | 65.04±8.15 | 65.48±8.05 | 64.65±8.22 | 63.76±7.62            | 65.45±8.47 | 65.06±7.95 |
| <b>n<sub>unrelated</sub></b>   | 5779       | 2755       | 3024       | 1185                  | 2316       | 2278       |
| <b>Age</b>                     | 64.91±8.33 | 65.51±8.21 | 64.37±8.40 | 63.96±7.71            | 65.38±8.69 | 64.93±8.22 |

<sup>a</sup> Age of each subgroup is described as mean ± standard deviation;

<sup>b</sup> Including monozygotic (MZ), same-sex dizygotic (SSDZ) and opposite-sex dizygotic (OSDZ) twins.

**Table S2. Eighteen traits and units**

| <b>Trait</b>                | <b>Abbreviation</b> | <b>Unit</b>                 |
|-----------------------------|---------------------|-----------------------------|
| Total cholesterol           | TC                  | mmol/L                      |
| High density lipoprotein    | HDL                 | mmol/L                      |
| Low density lipoprotein     | LDL                 | mmol/L                      |
| Apolipoprotein A1           | ApoA1               | g/L                         |
| Apolipoprotein B            | ApoB                | g/L                         |
| Triglyceride                | TG                  | mmol/L                      |
| C-reactive Protein          | CRP                 | mg/L                        |
| Glucose                     | Glu                 | mmol/L                      |
| Glycosylated hemoglobin A1c | HbA1c               | %                           |
| Hemoglobin                  | HB                  | g/dL                        |
| Cystatin C                  | CysC                | mg/L                        |
| Creatinine                  | Crea                | μmol/L                      |
| Glomerular filtration rate  | GFR                 | mL/min /1.73 m <sup>2</sup> |
| Immunoglobulin A            | IgA                 | g/L                         |
| Body mass index             | BMI                 | kg/m <sup>2</sup>           |
| Weight                      | WT                  | kg                          |
| Waist circumference         | WC                  | cm                          |
| Height                      |                     | m                           |

**Table S3. Descriptive statistics of each trait**

| Trait         | All         | Gender <sup>a</sup> |             | Zygosity <sup>b</sup> |             |             |
|---------------|-------------|---------------------|-------------|-----------------------|-------------|-------------|
|               |             | Male                | Female      | MZ                    | SSDZ        | OSDZ        |
| <b>TC</b>     | 5.77±1.12   | 5.52±1.10           | 6.00±1.09   | 5.77±1.12             | 5.79±1.12   | 5.76±1.13   |
| n             | 10682       | 5074                | 5608        | 2499                  | 4154        | 4029        |
| <b>HDL</b>    | 1.41±0.42   | 1.24±0.34           | 1.56±0.42   | 1.40±0.43             | 1.42±0.42   | 1.39±0.42   |
| n             | 10682       | 5074                | 5608        | 2499                  | 4154        | 4029        |
| <b>LDL</b>    | 3.76±0.99   | 3.65±0.98           | 3.86±0.99   | 3.78±0.98             | 3.76±0.99   | 3.74±0.99   |
| n             | 10543       | 4985                | 5558        | 2467                  | 4102        | 3974        |
| <b>ApoA1</b>  | 1.64±0.30   | 1.53±0.26           | 1.75±0.30   | 1.64±0.31             | 1.64±0.30   | 1.64±0.30   |
| n             | 10678       | 5073                | 5605        | 2497                  | 4154        | 4027        |
| <b>ApoB</b>   | 1.08±0.25   | 1.07±0.24           | 1.10±0.25   | 1.07±0.24             | 1.09±0.25   | 1.09±0.25   |
| n             | 10678       | 5073                | 5605        | 2497                  | 4154        | 4027        |
| <b>TG</b>     | 1.37±0.82   | 1.44±0.92           | 1.30±0.72   | 1.33±0.78             | 1.36±0.83   | 1.39±0.83   |
| n             | 10681       | 5073                | 5608        | 2499                  | 4153        | 4029        |
| <b>CRP</b>    | 3.13±6.61   | 3.29±7.95           | 3.00±5.10   | 3.05±6.80             | 3.14±6.84   | 3.18±6.24   |
| n             | 10679       | 5074                | 5605        | 2498                  | 4153        | 4028        |
| <b>Glu</b>    | 5.59±1.22   | 5.76±1.33           | 5.44±1.08   | 5.53±1.09             | 5.60±1.25   | 5.63±1.26   |
| n             | 10676       | 5073                | 5603        | 2499                  | 4150        | 4027        |
| <b>HbA1c</b>  | 4.82±0.68   | 4.85±0.74           | 4.78±0.61   | 4.77±0.60             | 4.82±0.67   | 4.84±0.72   |
| n             | 10668       | 5069                | 5599        | 2498                  | 4150        | 4020        |
| <b>HB</b>     | 14.26±1.21  | 14.86±1.13          | 13.72±1.00  | 14.31±1.19            | 14.18±1.22  | 14.32±1.20  |
| n             | 10664       | 5065                | 5599        | 2495                  | 4148        | 4021        |
| <b>CysC</b>   | 1.02±0.29   | 1.05±0.33           | 0.99±0.25   | 0.99±0.22             | 1.03±0.30   | 1.03±0.32   |
| n             | 10405       | 4936                | 5469        | 2453                  | 4020        | 3932        |
| <b>Crea</b>   | 78.01±28.17 | 87.36±35.68         | 69.58±14.51 | 77.46±16.47           | 77.50±22.12 | 78.89±37.80 |
| n             | 10405       | 4936                | 5469        | 2453                  | 4020        | 3932        |
| <b>GFR</b>    | 83.55±21.88 | 80.74±21.94         | 86.08±21.53 | 85.94±21.15           | 83.04±22.40 | 82.58±21.70 |
| n             | 10404       | 4935                | 5469        | 2453                  | 4020        | 3931        |
| <b>IgA</b>    | 2.52±1.14   | 2.67±1.18           | 2.39±1.08   | 2.37±1.02             | 2.51±1.15   | 2.63±1.19   |
| n             | 10621       | 5046                | 5575        | 2489                  | 4139        | 3993        |
| <b>BMI</b>    | 26.31±7.33  | 26.59±6.83          | 26.07±7.75  | 26.34±8.56            | 26.20±7.37  | 26.42±6.40  |
| n             | 10562       | 5021                | 5541        | 2484                  | 4110        | 3968        |
| <b>WT</b>     | 74.94±13.81 | 81.77±12.33         | 68.75±12.05 | 75.11±13.95           | 74.18±13.59 | 75.62±13.91 |
| n             | 10570       | 5027                | 5543        | 2487                  | 4113        | 3970        |
| <b>WC</b>     | 91.78±12.18 | 97.16±10.26         | 86.91±11.72 | 91.97±12.01           | 91.25±11.98 | 92.22±12.47 |
| n             | 10556       | 5019                | 5537        | 2485                  | 4106        | 3965        |
| <b>Height</b> | 1.69±0.10   | 1.76±0.09           | 1.63±0.08   | 1.70±0.10             | 1.69±0.10   | 1.70±0.10   |
| n             | 10573       | 5026                | 5547        | 2486                  | 4118        | 3969        |

<sup>a</sup> Sex-difference: TC, HDL, LDL, ApoA1, ApoB and GFR were significantly lower in males (P<0.05); TG, CRP, Glu, HbA1c, HB, CysC, Crea, IgA, BMI, weight, waist circumference and height were significantly higher in males (P<0.05);

<sup>b</sup> HDL, ApoB, TG, Glu, HbA1c, HB, CysC, Crea, GFR, IgA, weight, waist circumference and height were significantly different among monozygotic (MZ), same-sex dizygotic (SSDZ) and opposite-sex dizygotic (OSDZ) twins (P<0.05).

**Table S4. Estimates and parameters in SNP-based GREML(d) analyses**

| Trait         | GRM <sup>a</sup> | V(G) <sup>b</sup> | V(e) <sup>c</sup> | Vp <sup>d</sup> | V(G)/Vp <sup>e</sup> | logL <sup>f</sup> | logL0 <sup>g</sup> | LRT <sup>h</sup> | df <sup>i</sup> | P <sup>j</sup> |
|---------------|------------------|-------------------|-------------------|-----------------|----------------------|-------------------|--------------------|------------------|-----------------|----------------|
| <b>TC</b>     | GREML            | 0.15              | 0.83              | 0.98            | <b>0.15</b>          | -2837.23          | -2840.16           | 5.87             | 1               | 7.69E-3        |
| (n=5779)      | GREMLd           | 0.00              | 0.98              | 0.98            | 0.00                 | -2840.16          | -2840.16           | 0.00             | 1               | 0.50           |
| <b>LDL</b>    | GREML            | 0.15              | 0.83              | 0.99            | <b>0.16</b>          | -2814.76          | -2818.06           | 6.59             | 1               | 5.14E-3        |
| (n=5704)      | GREMLd           | 0.00              | 0.99              | 0.99            | 0.00                 | -2818.06          | -2818.06           | 0.00             | 1               | 0.50           |
| <b>ApoB</b>   | GREML            | 0.14              | 0.85              | 0.99            | <b>0.14</b>          | -2861.98          | -2864.65           | 5.33             | 1               | 0.01           |
| (n=5776)      | GREMLd           | 0.00              | 0.99              | 0.99            | 0.00                 | -2864.65          | -2864.65           | 0.00             | 1               | 0.50           |
| <b>TG</b>     | GREML            | 0.31              | 0.68              | 0.99            | <b>0.31</b>          | -2841.81          | -2856.49           | 29.35            | 1               | 3.02E-8        |
| (n=5778)      | GREMLd           | 0.28              | 0.71              | 0.99            | <b>0.28</b>          | -2851.29          | -2856.49           | 10.40            | 1               | 6.29E-4        |
| <b>CRP</b>    | GREML            | 0.38              | 0.63              | 1.01            | <b>0.37</b>          | -2906.29          | -2932.21           | 51.84            | 1               | 3.02E-13       |
| (n=5777)      | GREMLd           | 0.00              | 1.01              | 1.01            | 0.00                 | -2932.21          | -2932.21           | 0.00             | 1               | 0.50           |
| <b>Glu</b>    | GREML            | 0.17              | 0.82              | 0.99            | <b>0.17</b>          | -2847.99          | -2852.33           | 8.66             | 1               | 1.62E-3        |
| (n=5775)      | GREMLd           | 0.15              | 0.84              | 0.99            | 0.15                 | -2850.98          | -2852.33           | 2.69             | 1               | 0.05           |
| <b>HbA1c</b>  | GREML            | 0.20              | 0.80              | 1.00            | <b>0.20</b>          | -2880.00          | -2885.65           | 11.30            | 1               | 3.88E-4        |
| (n=5770)      | GREMLd           | 0.00              | 1.00              | 1.00            | 0.00                 | -2885.65          | -2885.65           | 0.00             | 1               | 0.50           |
| <b>HB</b>     | GREML            | 0.21              | 0.80              | 1.01            | <b>0.21</b>          | -2921.46          | -2927.49           | 12.07            | 1               | 2.56E-4        |
| (n=5769)      | GREMLd           | 0.00              | 1.01              | 1.01            | 0.00                 | -2927.49          | -2927.49           | 0.00             | 1               | 0.50           |
| <b>CysC</b>   | GREML            | 0.28              | 0.74              | 1.02            | <b>0.27</b>          | -2877.14          | -2886.99           | 19.71            | 1               | 4.51E-6        |
| (n=5634)      | GREMLd           | 0.05              | 0.97              | 1.02            | 0.05                 | -2886.82          | -2886.99           | 0.34             | 1               | 0.28           |
| <b>Crea</b>   | GREML            | 0.18              | 0.83              | 1.01            | <b>0.18</b>          | -2848.49          | -2853.10           | 9.21             | 1               | 1.20E-3        |
| (n=5634)      | GREMLd           | 0.01              | 1.01              | 1.01            | 0.01                 | -2853.09          | -2853.10           | 0.00             | 1               | 0.48           |
| <b>GFR</b>    | GREML            | 0.33              | 0.69              | 1.02            | <b>0.32</b>          | -2869.81          | -2883.10           | 26.59            | 1               | 1.26E-7        |
| (n=5633)      | GREMLd           | 0.04              | 0.99              | 1.02            | 0.03                 | -2883.03          | -2883.10           | 0.14             | 1               | 0.35           |
| <b>BMI</b>    | GREML            | 0.20              | 0.78              | 0.98            | <b>0.21</b>          | -2792.70          | -2799.26           | 13.11            | 1               | 1.47E-4        |
| (n=5695)      | GREMLd           | 0.02              | 0.96              | 0.98            | 0.02                 | -2799.22          | -2799.26           | 0.08             | 1               | 0.39           |
| <b>WT</b>     | GREML            | 0.26              | 0.72              | 0.98            | <b>0.26</b>          | -2788.92          | -2797.98           | 18.13            | 1               | 1.03E-5        |
| (n=5699)      | GREMLd           | 0.11              | 0.87              | 0.98            | 0.11                 | -2797.18          | -2797.98           | 1.61             | 1               | 0.10           |
| <b>WC</b>     | GREML            | 0.16              | 0.81              | 0.97            | <b>0.16</b>          | -2763.68          | -2767.08           | 6.81             | 1               | 4.55E-3        |
| (n=5693)      | GREMLd           | 0.19              | 0.78              | 0.97            | <b>0.19</b>          | -2764.65          | -2767.08           | 4.86             | 1               | 0.01           |
| <b>HDL</b>    | GREML            | 0.24              | 0.77              | 1.01            | <b>0.24</b>          | -2911.87          | -2919.78           | 15.83            | 1               | 3.47E-5        |
| (n=5779)      | GREMLd           | 0.01              | 1.00              | 1.01            | 0.01                 | -2919.77          | -2919.78           | 0.03             | 1               | 0.44           |
| <b>ApoA1</b>  | GREML            | 0.17              | 0.84              | 1.00            | <b>0.17</b>          | -2899.83          | -2903.44           | 7.23             | 1               | 3.58E-3        |
| (n=5776)      | GREMLd           | 0.09              | 0.92              | 1.00            | 0.09                 | -2902.92          | -2903.44           | 1.05             | 1               | 0.15           |
| <b>IgA</b>    | GREML            | 0.25              | 0.77              | 1.02            | <b>0.24</b>          | -2916.66          | -2925.59           | 17.88            | 1               | 1.18E-5        |
| (n=5745)      | GREMLd           | 0.00              | 1.01              | 1.02            | 0.00                 | -2925.59          | -2925.59           | 0.00             | 1               | 0.49           |
| <b>Height</b> | GREML            | 0.62              | 0.39              | 1.01            | <b>0.62</b>          | -2828.89          | -2878.51           | 99.26            | 1               | <0.01          |
| (n=5701)      | GREMLd           | 0.00              | 1.01              | 1.01            | 0.00                 | -2878.51          | -2878.51           | 0.00             | 1               | 0.50           |

<sup>a</sup> Genomic-relatedness-matrix (additive or dominant); <sup>b</sup> Genetic variance (additive or dominant); <sup>c</sup> Non-shared environmental variance; <sup>d</sup> Phenotypic variance; <sup>e</sup> Additive or dominant genetic variance, significant dominance were labeled in red; <sup>f</sup> Log likelihood for the full model; <sup>g</sup> Log likelihood for the reduced model; <sup>h</sup> Likelihood ratio test; <sup>i</sup> Degree of freedom; <sup>j</sup> P value.

**Table S5. Model fitting for classic twin-based structural equation model**

| Trait | Model <sup>a</sup> | EP <sup>b</sup> | minus 2LL <sup>c</sup> | Df <sup>d</sup> | AIC <sup>e</sup> | diff LL <sup>f</sup> | diff df <sup>g</sup> | p <sup>h</sup>  |
|-------|--------------------|-----------------|------------------------|-----------------|------------------|----------------------|----------------------|-----------------|
| TC    | Saturated          | 10              | 21583.58               | 7730            | 6123.58          | NA                   | NA                   | NA              |
|       | ACE                | 4               | 21597.89               | 7736            | 6125.89          | 14.32                | 6                    | 2.63E-02        |
|       | <b>ADE</b>         | <b>4</b>        | <b>21592.47</b>        | <b>7736</b>     | <b>6120.47</b>   | <b>8.90</b>          | <b>6</b>             | <b>1.79E-01</b> |
|       | AE                 | 3               | 21597.89               | 7737            | 6123.89          | 14.32                | 7                    | 4.58E-02        |
| LDL   | Saturated          | 10              | 21272.02               | 7629            | 6014.02          | NA                   | NA                   | NA              |
|       | ACE                | 4               | 21287.48               | 7635            | 6017.48          | 15.46                | 6                    | 1.70E-02        |
|       | <b>ADE</b>         | <b>4</b>        | <b>21279.49</b>        | <b>7635</b>     | <b>6009.49</b>   | <b>7.47</b>          | <b>6</b>             | <b>2.79E-01</b> |
|       | AE                 | 3               | 21287.48               | 7636            | 6015.48          | 15.46                | 7                    | 3.05E-02        |
| ApoB  | Saturated          | 10              | 21413.46               | 7728            | 5957.46          | NA                   | NA                   | NA              |
|       | ACE                | 4               | 21424.26               | 7734            | 5956.26          | 10.81                | 6                    | 9.45E-02        |
|       | <b>ADE</b>         | <b>4</b>        | <b>21421.19</b>        | <b>7734</b>     | <b>5953.19</b>   | <b>7.74</b>          | <b>6</b>             | <b>2.58E-01</b> |
|       | AE                 | 3               | 21424.26               | 7735            | 5954.26          | 10.81                | 7                    | 1.47E-01        |
| TG    | Saturated          | 10              | 21310.31               | 7729            | 5852.31          | NA                   | NA                   | NA              |
|       | ACE                | 4               | 21324.27               | 7735            | 5854.27          | 13.96                | 6                    | 3.01E-02        |
|       | <b>ADE</b>         | <b>4</b>        | <b>21320.95</b>        | <b>7735</b>     | <b>5850.95</b>   | <b>10.64</b>         | <b>6</b>             | <b>1.00E-01</b> |
|       | AE                 | 3               | 21324.27               | 7736            | 5852.27          | 13.96                | 7                    | 5.20E-02        |
| CRP   | Saturated          | 10              | 21587.85               | 7728            | 6131.85          | NA                   | NA                   | NA              |
|       | ACE                | 4               | 21599.75               | 7734            | 6131.75          | 11.90                | 6                    | 6.43E-02        |
|       | <b>ADE</b>         | <b>4</b>        | <b>21596.98</b>        | <b>7734</b>     | <b>6128.98</b>   | <b>9.13</b>          | <b>6</b>             | <b>1.67E-01</b> |
|       | AE                 | 3               | 21599.75               | 7735            | 6129.75          | 11.90                | 7                    | 1.04E-01        |
| Glu   | Saturated          | 10              | 21521.28               | 7726            | 6069.28          | NA                   | NA                   | NA              |
|       | ACE                | 4               | 21551.71               | 7732            | 6087.71          | 30.43                | 6                    | 3.26E-05        |
|       | <b>ADE</b>         | <b>4</b>        | <b>21537.24</b>        | <b>7732</b>     | <b>6073.24</b>   | <b>15.96</b>         | <b>6</b>             | <b>1.40E-02</b> |
|       | AE                 | 3               | 21551.71               | 7733            | 6085.71          | 30.43                | 7                    | 7.93E-05        |
| HbA1c | Saturated          | 10              | 20836.70               | 7717            | 5402.70          | NA                   | NA                   | NA              |
|       | ACE                | 4               | 20876.72               | 7723            | 5430.72          | 40.02                | 6                    | 4.51E-07        |
|       | <b>ADE</b>         | <b>4</b>        | <b>20851.88</b>        | <b>7723</b>     | <b>5405.88</b>   | <b>15.18</b>         | <b>6</b>             | <b>1.89E-02</b> |
|       | AE                 | 3               | 20876.72               | 7724            | 5428.72          | 40.02                | 7                    | 1.25E-06        |
| HB    | Saturated          | 10              | 21246.00               | 7716            | 5814.00          | NA                   | NA                   | NA              |
|       | ACE                | 4               | 21256.52               | 7722            | 5812.52          | 10.51                | 6                    | 1.05E-01        |
|       | <b>ADE</b>         | <b>4</b>        | <b>21252.84</b>        | <b>7722</b>     | <b>5808.84</b>   | <b>6.84</b>          | <b>6</b>             | <b>3.36E-01</b> |
|       | AE                 | 3               | 21256.52               | 7723            | 5810.52          | 10.51                | 7                    | 1.61E-01        |
| CysC  | Saturated          | 10              | 20534.11               | 7524            | 5486.11          | NA                   | NA                   | NA              |
|       | ACE                | 4               | 20552.35               | 7530            | 5492.35          | 18.23                | 6                    | 5.67E-03        |
|       | <b>ADE</b>         | <b>4</b>        | <b>20546.69</b>        | <b>7530</b>     | <b>5486.69</b>   | <b>12.57</b>         | <b>6</b>             | <b>5.04E-02</b> |
|       | AE                 | 3               | 20552.35               | 7531            | 5490.35          | 18.23                | 7                    | 1.10E-02        |
| Crea  | Saturated          | 10              | 20720.13               | 7524            | 5672.13          | NA                   | NA                   | NA              |
|       | ACE                | 4               | 20735.30               | 7530            | 5675.30          | 15.18                | 6                    | 1.89E-02        |
|       | <b>ADE</b>         | <b>4</b>        | <b>20725.89</b>        | <b>7530</b>     | <b>5665.89</b>   | <b>5.76</b>          | <b>6</b>             | <b>4.51E-01</b> |
|       | AE                 | 3               | 20735.30               | 7531            | 5673.30          | 15.18                | 7                    | 3.38E-02        |
| GFR   | Saturated          | 10              | 20597.48               | 7524            | 5549.48          | NA                   | NA                   | NA              |
|       | ACE                | 4               | 20612.62               | 7530            | 5552.62          | 15.14                | 6                    | 1.92E-02        |
|       | <b>ADE</b>         | <b>4</b>        | <b>20605.68</b>        | <b>7530</b>     | <b>5545.69</b>   | <b>8.20</b>          | <b>6</b>             | <b>2.24E-01</b> |

|               |            |          |                 |             |                |              |          |                 |
|---------------|------------|----------|-----------------|-------------|----------------|--------------|----------|-----------------|
|               | AE         | 3        | 20612.62        | 7531        | 5550.62        | 15.14        | 7        | 3.43E-02        |
| <b>BMI</b>    | Saturated  | 10       | 20876.61        | 7669        | 5538.61        | NA           | NA       | NA              |
|               | ACE        | 4        | 20912.53        | 7675        | 5562.53        | 35.92        | 6        | 2.85E-06        |
|               | <b>ADE</b> | <b>4</b> | <b>20881.45</b> | <b>7675</b> | <b>5531.45</b> | <b>4.84</b>  | <b>6</b> | <b>5.64E-01</b> |
|               | AE         | 3        | 20912.53        | 7676        | 5560.53        | 35.92        | 7        | 7.50E-06        |
| <b>WT</b>     | Saturated  | 10       | 20721.53        | 7674        | 5373.54        | NA           | NA       | NA              |
|               | ACE        | 4        | 20755.37        | 7680        | 5395.37        | 33.83        | 6        | 7.24E-06        |
|               | <b>ADE</b> | <b>4</b> | <b>20730.42</b> | <b>7680</b> | <b>5370.42</b> | <b>8.89</b>  | <b>6</b> | <b>1.80E-01</b> |
|               | AE         | 3        | 20755.37        | 7681        | 5393.37        | 33.83        | 7        | 1.85E-05        |
| <b>WC</b>     | Saturated  | 10       | 21035.29        | 7661        | 5713.29        | NA           | NA       | NA              |
|               | ACE        | 4        | 21082.82        | 7667        | 5748.82        | 47.52        | 6        | 1.47E-08        |
|               | <b>ADE</b> | <b>4</b> | <b>21040.72</b> | <b>7667</b> | <b>5706.73</b> | <b>5.43</b>  | <b>6</b> | <b>4.90E-01</b> |
|               | AE         | 3        | 21082.82        | 7668        | 5746.82        | 47.52        | 7        | 4.41E-08        |
| <b>HDL</b>    | Saturated  | 10       | 20977.12        | 7730        | 5517.12        | NA           | NA       | NA              |
|               | ACE        | 4        | 20988.98        | 7736        | 5516.98        | 11.86        | 6        | 6.51E-02        |
|               | ADE        | 4        | 20987.38        | 7736        | 5515.38        | 10.26        | 6        | 1.14E-01        |
|               | <b>AE</b>  | <b>3</b> | <b>20988.98</b> | <b>7737</b> | <b>5514.98</b> | <b>11.86</b> | <b>7</b> | <b>1.05E-01</b> |
| <b>ApoA1</b>  | Saturated  | 10       | 21035.10        | 7728        | 5579.10        | NA           | NA       | NA              |
|               | ACE        | 4        | 21047.81        | 7734        | 5579.81        | 12.71        | 6        | 4.79E-02        |
|               | ADE        | 4        | 21048.01        | 7734        | 5580.01        | 12.91        | 6        | 4.44E-02        |
|               | <b>AE</b>  | <b>3</b> | <b>21048.01</b> | <b>7735</b> | <b>5578.01</b> | <b>12.91</b> | <b>7</b> | <b>7.42E-02</b> |
| <b>IgA</b>    | Saturated  | 10       | 21121.74        | 7681        | 5759.74        | NA           | NA       | NA              |
|               | <b>ACE</b> | <b>4</b> | <b>21187.33</b> | <b>7687</b> | <b>5813.34</b> | <b>65.59</b> | <b>6</b> | <b>3.26E-12</b> |
|               | ADE        | 4        | 21190.83        | 7687        | 5816.83        | 69.09        | 6        | 6.29E-13        |
|               | AE         | 3        | 21190.83        | 7688        | 5814.83        | 69.09        | 7        | 2.26E-12        |
| <b>Height</b> | Saturated  | 10       | 19587.10        | 7675        | 4237.10        | NA           | NA       | NA              |
|               | <b>ACE</b> | <b>4</b> | <b>19596.82</b> | <b>7681</b> | <b>4234.82</b> | <b>9.72</b>  | <b>6</b> | <b>1.37E-01</b> |
|               | ADE        | 4        | 19606.82        | 7681        | 4244.82        | 19.72        | 6        | 3.11E-03        |
|               | AE         | 3        | 19606.82        | 7682        | 4242.82        | 19.72        | 7        | 6.21E-03        |

<sup>a</sup> Each model is compared with saturated model, and the model in bold is the best fitted model according to Akaike information criterion;

<sup>b</sup> EP: number of estimated parameters;

<sup>c</sup> minus 2LL: minus 2 log likelihood;

<sup>d</sup> df: degree of freedom;

<sup>e</sup> AIC: Akaike information criterion;

<sup>f</sup> diff LL: difference of log likelihood;

<sup>g</sup> diff df: difference of df;

<sup>h</sup> P: P value.

**Table S6. Intra-pair correlation and Falconer estimation for each trait**

| Trait         | Intra-pair correlation <sup>a</sup> |             |             |             | Falconer Equation <sup>b</sup> |              |             |
|---------------|-------------------------------------|-------------|-------------|-------------|--------------------------------|--------------|-------------|
|               | $r_{MZ}$                            | $r_{DZ}$    | $r_{SSDZ}$  | $r_{OSDZ}$  | A                              | C            | E           |
| <b>TC</b>     | <b>0.48</b>                         | <b>0.19</b> | <b>0.20</b> | <b>0.18</b> | <b>0.58</b>                    | <b>-0.10</b> | <b>0.52</b> |
| 95% CI        | (0.43-0.52)                         | (0.15-0.23) | (0.15-0.25) | (0.12-0.23) |                                |              |             |
| <b>LDL</b>    | <b>0.46</b>                         | <b>0.18</b> | <b>0.19</b> | <b>0.16</b> | <b>0.56</b>                    | <b>-0.10</b> | <b>0.54</b> |
| 95% CI        | (0.41-0.51)                         | (0.14-0.21) | (0.14-0.24) | (0.11-0.22) |                                |              |             |
| <b>ApoB</b>   | <b>0.52</b>                         | <b>0.23</b> | <b>0.26</b> | <b>0.20</b> | <b>0.58</b>                    | <b>-0.06</b> | <b>0.48</b> |
| 95% CI        | (0.48-0.57)                         | (0.20-0.27) | (0.21-0.31) | (0.15-0.25) |                                |              |             |
| <b>TG</b>     | <b>0.55</b>                         | <b>0.24</b> | <b>0.27</b> | <b>0.21</b> | <b>0.62</b>                    | <b>-0.07</b> | <b>0.45</b> |
| 95% CI        | (0.51-0.59)                         | (0.21-0.28) | (0.23-0.32) | (0.16-0.26) |                                |              |             |
| <b>CRP</b>    | <b>0.42</b>                         | <b>0.19</b> | <b>0.21</b> | <b>0.17</b> | <b>0.46</b>                    | <b>-0.04</b> | <b>0.58</b> |
| 95% CI        | (0.37-0.46)                         | (0.15-0.23) | (0.16-0.26) | (0.12-0.22) |                                |              |             |
| <b>Glu</b>    | <b>0.51</b>                         | <b>0.20</b> | <b>0.23</b> | <b>0.17</b> | <b>0.62</b>                    | <b>-0.11</b> | <b>0.49</b> |
| 95% CI        | (0.46-0.55)                         | (0.16-0.24) | (0.18-0.28) | (0.11-0.22) |                                |              |             |
| <b>HbA1c</b>  | <b>0.69</b>                         | <b>0.28</b> | <b>0.27</b> | <b>0.28</b> | <b>0.82</b>                    | <b>-0.13</b> | <b>0.31</b> |
| 95% CI        | (0.66-0.72)                         | (0.24-0.31) | (0.23-0.32) | (0.23-0.33) |                                |              |             |
| <b>HB</b>     | <b>0.55</b>                         | <b>0.24</b> | <b>0.27</b> | <b>0.21</b> | <b>0.62</b>                    | <b>-0.07</b> | <b>0.45</b> |
| 95% CI        | (0.50-0.59)                         | (0.21-0.28) | (0.23-0.32) | (0.16-0.26) |                                |              |             |
| <b>CysC</b>   | <b>0.57</b>                         | <b>0.26</b> | <b>0.27</b> | <b>0.26</b> | <b>0.62</b>                    | <b>-0.05</b> | <b>0.43</b> |
| 95% CI        | (0.53-0.61)                         | (0.23-0.30) | (0.22-0.32) | (0.20-0.31) |                                |              |             |
| <b>Crea</b>   | <b>0.58</b>                         | <b>0.24</b> | <b>0.27</b> | <b>0.21</b> | <b>0.68</b>                    | <b>-0.10</b> | <b>0.42</b> |
| 95% CI        | (0.54-0.62)                         | (0.20-0.28) | (0.22-0.32) | (0.16-0.26) |                                |              |             |
| <b>GFR</b>    | <b>0.57</b>                         | <b>0.24</b> | <b>0.24</b> | <b>0.24</b> | <b>0.66</b>                    | <b>-0.09</b> | <b>0.43</b> |
| 95% CI        | (0.53-0.61)                         | (0.21-0.28) | (0.19-0.29) | (0.19-0.29) |                                |              |             |
| <b>BMI</b>    | <b>0.68</b>                         | <b>0.24</b> | <b>0.29</b> | <b>0.18</b> | <b>0.88</b>                    | <b>-0.20</b> | <b>0.32</b> |
| 95% CI        | (0.64-0.71)                         | (0.21-0.28) | (0.25-0.34) | (0.13-0.24) |                                |              |             |
| <b>WT</b>     | <b>0.73</b>                         | <b>0.27</b> | <b>0.33</b> | <b>0.21</b> | <b>0.92</b>                    | <b>-0.19</b> | <b>0.27</b> |
| 95% CI        | (0.70-0.75)                         | (0.24-0.31) | (0.28-0.37) | (0.16-0.26) |                                |              |             |
| <b>WC</b>     | <b>0.63</b>                         | <b>0.20</b> | <b>0.27</b> | <b>0.13</b> | <b>0.86</b>                    | <b>-0.23</b> | <b>0.37</b> |
| 95% CI        | (0.59-0.67)                         | (0.16-0.24) | (0.22-0.31) | (0.08-0.19) |                                |              |             |
| <b>HDL</b>    | <b>0.67</b>                         | <b>0.31</b> | <b>0.34</b> | <b>0.28</b> | <b>0.72</b>                    | <b>-0.05</b> | <b>0.33</b> |
| 95% CI        | (0.64-0.70)                         | (0.28-0.34) | (0.29-0.38) | (0.23-0.33) |                                |              |             |
| <b>ApoA1</b>  | <b>0.65</b>                         | <b>0.34</b> | <b>0.38</b> | <b>0.29</b> | <b>0.62</b>                    | <b>0.03</b>  | <b>0.35</b> |
| 95% CI        | (0.61-0.68)                         | (0.30-0.37) | (0.33-0.42) | (0.24-0.34) |                                |              |             |
| <b>IgA</b>    | <b>0.43</b>                         | <b>0.28</b> | <b>0.31</b> | <b>0.26</b> | <b>0.30</b>                    | <b>0.13</b>  | <b>0.57</b> |
| 95% CI        | (0.38-0.48)                         | (0.25-0.32) | (0.26-0.35) | (0.21-0.31) |                                |              |             |
| <b>Height</b> | <b>0.87</b>                         | <b>0.48</b> | <b>0.49</b> | <b>0.46</b> | <b>0.78</b>                    | <b>0.09</b>  | <b>0.13</b> |
| 95% CI        | (0.85-0.88)                         | (0.45-0.51) | (0.45-0.53) | (0.42-0.51) |                                |              |             |

<sup>a</sup> All intra-pair correlations of each biomarker in each group were significant ( $P < 0.0001$ );

<sup>b</sup> Falconer equations:  $A = 2(r_{MZ} - r_{DZ})$ ;  $C = r_{MZ} - A$ ;  $E = 1 - r_{MZ}$ ; A: additive genetic variance, C: shared environmental variance, E: non-shared/unique environmental variance.



**Table S7. Estimates from classic and sex-limitation structural equation model**

| Traits                    |        | ACE model      |             |                |             | ADE model      |                    |                |                    | AE model       |                    |
|---------------------------|--------|----------------|-------------|----------------|-------------|----------------|--------------------|----------------|--------------------|----------------|--------------------|
|                           |        | h <sup>2</sup> | 95% CI      | c <sup>2</sup> | 95%CI       | h <sup>2</sup> | 95% CI             | d <sup>2</sup> | 95%CI              | h <sup>2</sup> | 95% CI             |
| <b>Total cholesterol</b>  | All    | 0.45           | (0.40,0.49) | 0.00           | (0.00,0.03) | <b>0.28</b>    | <b>(0.13,0.43)</b> | <b>0.19</b>    | <b>(0.03,0.36)</b> | 0.45           | (0.41,0.49)        |
|                           | Male   | 0.42           | (0.22,0.48) | 0.00           | (0.00,0.17) | 0.43           | (0.11,0.48)        | 0.00           | (0.00,0.33)        | <b>0.43</b>    | <b>(0.36,0.48)</b> |
|                           | Female | 0.51           | (0.42,0.56) | 0.00           | (0.00,0.06) | 0.28           | (0.01,0.53)        | 0.25           | (0.00,0.53)        | <b>0.51</b>    | <b>(0.45,0.56)</b> |
| <b>LDL</b>                | All    | 0.43           | (0.39,0.47) | 0.00           | (0.00,0.03) | <b>0.23</b>    | <b>(0.08,0.38)</b> | <b>0.24</b>    | <b>(0.07,0.41)</b> | 0.43           | (0.39,0.47)        |
|                           | Male   | 0.38           | (0.17,0.45) | 0.00           | (0.00,0.17) | <b>0.38</b>    | <b>(0.04,0.45)</b> | <b>0.00</b>    | <b>(0.00,0.36)</b> | 0.38           | (0.32,0.45)        |
|                           | Female | 0.52           | (0.45,0.57) | 0.00           | (0.00,0.05) | <b>0.20</b>    | <b>(0.00,0.46)</b> | <b>0.34</b>    | <b>(0.07,0.59)</b> | 0.52           | (0.46,0.57)        |
| <b>Apolipoprotein B</b>   | All    | 0.51           | (0.46,0.55) | 0.00           | (0.00,0.03) | <b>0.39</b>    | <b>(0.25,0.53)</b> | <b>0.14</b>    | <b>(0.00,0.30)</b> | 0.51           | (0.48,0.55)        |
|                           | Male   | 0.40           | (0.21,0.51) | 0.05           | (0.00,0.20) | 0.46           | (0.23,0.51)        | 0.00           | (0.00,0.24)        | <b>0.46</b>    | <b>(0.40,0.51)</b> |
|                           | Female | 0.61           | (0.52,0.65) | 0.00           | (0.00,0.06) | 0.42           | (0.17,0.63)        | 0.19           | (0.00,0.46)        | <b>0.61</b>    | <b>(0.56,0.65)</b> |
| <b>Triglyceride</b>       | All    | 0.54           | (0.49,0.58) | 0.00           | (0.00,0.03) | <b>0.42</b>    | <b>(0.27,0.55)</b> | <b>0.14</b>    | <b>(0.00,0.30)</b> | 0.54           | (0.51,0.58)        |
|                           | Male   | 0.55           | (0.40,0.60) | 0.00           | (0.00,0.12) | 0.51           | (0.22,0.60)        | 0.04           | (0.00,0.35)        | <b>0.55</b>    | <b>(0.50,0.60)</b> |
|                           | Female | 0.56           | (0.46,0.61) | 0.00           | (0.00,0.08) | 0.45           | (0.20,0.61)        | 0.12           | (0.00,0.39)        | <b>0.56</b>    | <b>(0.51,0.61)</b> |
| <b>C-reactive protein</b> | All    | 0.42           | (0.36,0.46) | 0.00           | (0.00,0.04) | <b>0.30</b>    | <b>(0.15,0.44)</b> | <b>0.14</b>    | <b>(0.00,0.31)</b> | 0.42           | (0.38,0.46)        |
|                           | Male   | 0.40           | (0.27,0.46) | 0.00           | (0.00,0.10) | 0.24           | (0.00,0.45)        | 0.18           | (0.00,0.46)        | <b>0.40</b>    | <b>(0.33,0.46)</b> |
|                           | Female | 0.47           | (0.31,0.53) | 0.00           | (0.00,0.00) | 0.44           | (0.18,0.53)        | 0.04           | (0.00,0.32)        | <b>0.47</b>    | <b>(0.41,0.53)</b> |
| <b>Glucose</b>            | All    | 0.50           | (0.46,0.54) | 0.00           | (0.00,0.02) | <b>0.24</b>    | <b>(0.09,0.38)</b> | <b>0.30</b>    | <b>(0.15,0.46)</b> | 0.50           | (0.46,0.54)        |
|                           | Male   | 0.54           | (0.45,0.59) | 0.00           | (0.00,0.07) | <b>0.28</b>    | <b>(0.00,0.56)</b> | <b>0.27</b>    | <b>(0.00,0.58)</b> | 0.54           | (0.48,0.59)        |
|                           | Female | 0.52           | (0.41,0.57) | 0.00           | (0.00,0.08) | <b>0.38</b>    | <b>(0.13,0.56)</b> | <b>0.15</b>    | <b>(0.00,0.42)</b> | 0.52           | (0.46,0.57)        |
| <b>HbA1c</b>              | All    | 0.70           | (0.67,0.72) | 0.00           | (0.00,0.01) | <b>0.37</b>    | <b>(0.24,0.51)</b> | <b>0.35</b>    | <b>(0.21,0.49)</b> | 0.70           | (0.67,0.72)        |
|                           | Male   | 0.72           | (0.68,0.76) | 0.00           | (0.00,0.03) | <b>0.18</b>    | <b>(0.00,0.47)</b> | <b>0.56</b>    | <b>(0.26,0.76)</b> | 0.72           | (0.68,0.76)        |
|                           | Female | 0.69           | (0.61,0.73) | 0.00           | (0.00,0.06) | <b>0.54</b>    | <b>(0.30,0.72)</b> | <b>0.15</b>    | <b>(0.00,0.40)</b> | 0.69           | (0.65,0.73)        |
| <b>Hemoglobin</b>         | All    | 0.54           | (0.49,0.57) | 0.00           | (0.00,0.03) | <b>0.41</b>    | <b>(0.26,0.55)</b> | <b>0.15</b>    | <b>(0.00,0.30)</b> | 0.54           | (0.50,0.57)        |
|                           | Male   | 0.53           | (0.42,0.58) | 0.00           | (0.00,0.09) | 0.38           | (0.07,0.58)        | 0.16           | (0.00,0.49)        | <b>0.53</b>    | <b>(0.48,0.58)</b> |
|                           | Female | 0.54           | (0.39,0.63) | 0.04           | (0.00,0.16) | 0.58           | (0.40,0.63)        | 0.00           | (0.00,0.19)        | <b>0.58</b>    | <b>(0.53,0.63)</b> |
| <b>Cystatin C</b>         | All    | 0.59           | (0.54,0.62) | 0.00           | (0.00,0.03) | <b>0.42</b>    | <b>(0.28,0.56)</b> | <b>0.18</b>    | <b>(0.03,0.34)</b> | 0.59           | (0.55,0.62)        |
|                           | Male   | 0.53           | (0.45,0.58) | 0.00           | (0.00,0.06) | <b>0.21</b>    | <b>(0.00,0.51)</b> | <b>0.34</b>    | <b>(0.03,0.59)</b> | 0.53           | (0.47,0.58)        |

|                            |        |             |                    |             |                    |             |                    |             |                    |             |                    |
|----------------------------|--------|-------------|--------------------|-------------|--------------------|-------------|--------------------|-------------|--------------------|-------------|--------------------|
|                            | Female | 0.68        | (0.58,0.71)        | 0.00        | (0.00,0.08)        | <b>0.59</b> | <b>(0.34,0.71)</b> | <b>0.09</b> | <b>(0.00,0.35)</b> | 0.68        | (0.63,0.71)        |
| <b>Creatinine</b>          | All    | 0.57        | (0.53,0.60)        | 0.00        | (0.00,0.02)        | <b>0.35</b> | <b>(0.21,0.50)</b> | <b>0.24</b> | <b>(0.09,0.40)</b> | 0.57        | (0.53,0.60)        |
|                            | Male   | 0.56        | (0.49,0.61)        | 0.00        | (0.00,0.04)        | <b>0.09</b> | <b>(0.00,0.39)</b> | <b>0.50</b> | <b>(0.18,0.63)</b> | 0.56        | (0.50,0.61)        |
|                            | Female | 0.49        | (0.35,0.64)        | 0.12        | (0.00,0.24)        | <b>0.63</b> | <b>(0.52,0.67)</b> | <b>0.00</b> | <b>(0.00,0.11)</b> | 0.63        | (0.58,0.67)        |
| <b>GFR</b>                 | All    | 0.56        | (0.52,0.60)        | 0.00        | (0.00,0.03)        | <b>0.38</b> | <b>(0.23,0.52)</b> | <b>0.21</b> | <b>(0.05,0.36)</b> | 0.56        | (0.53,0.60)        |
|                            | Male   | 0.51        | (0.44,0.57)        | 0.00        | (0.00,0.05)        | <b>0.08</b> | <b>(0.00,0.38)</b> | <b>0.46</b> | <b>(0.14,0.59)</b> | 0.51        | (0.45,0.57)        |
|                            | Female | 0.63        | (0.50,0.67)        | 0.00        | (0.00,0.11)        | <b>0.61</b> | <b>(0.35,0.67)</b> | <b>0.03</b> | <b>(0.00,0.29)</b> | 0.63        | (0.59,0.67)        |
| <b>Body mass index</b>     | All    | 0.65        | (0.62,0.68)        | 0.00        | (0.00,0.01)        | <b>0.28</b> | <b>(0.13,0.42)</b> | <b>0.41</b> | <b>(0.26,0.56)</b> | 0.65        | (0.62,0.68)        |
|                            | Male   | 0.66        | (0.59,0.70)        | 0.00        | (0.00,0.06)        | <b>0.37</b> | <b>(0.06,0.66)</b> | <b>0.30</b> | <b>(0.01,0.62)</b> | 0.66        | (0.61,0.70)        |
|                            | Female | 0.68        | (0.60,0.72)        | 0.00        | (0.00,0.07)        | <b>0.56</b> | <b>(0.32,0.71)</b> | <b>0.12</b> | <b>(0.00,0.38)</b> | 0.68        | (0.64,0.72)        |
| <b>Weight</b>              | All    | 0.70        | (0.68,0.73)        | 0.00        | (0.00,0.01)        | <b>0.37</b> | <b>(0.23,0.51)</b> | <b>0.35</b> | <b>(0.21,0.50)</b> | 0.70        | (0.68,0.73)        |
|                            | Male   | 0.73        | (0.63,0.76)        | 0.00        | (0.00,0.09)        | 0.63        | (0.34,0.76)        | 0.10        | (0.00,0.40)        | <b>0.73</b> | <b>(0.70,0.76)</b> |
|                            | Female | 0.71        | (0.62,0.74)        | 0.00        | (0.00,0.08)        | 0.61        | (0.36,0.74)        | 0.10        | (0.00,0.36)        | <b>0.71</b> | <b>(0.67,0.74)</b> |
| <b>Waist circumference</b> | All    | 0.60        | (0.56,0.63)        | 0.00        | (0.00,0.01)        | <b>0.15</b> | <b>(0.01,0.29)</b> | <b>0.49</b> | <b>(0.34,0.65)</b> | 0.60        | (0.56,0.63)        |
|                            | Male   | 0.63        | (0.56,0.68)        | 0.00        | (0.00,0.06)        | <b>0.32</b> | <b>(0.01,0.62)</b> | <b>0.32</b> | <b>(0.02,0.65)</b> | 0.63        | (0.59,0.68)        |
|                            | Female | 0.63        | (0.54,0.67)        | 0.00        | (0.00,0.08)        | <b>0.51</b> | <b>(0.25,0.67)</b> | <b>0.13</b> | <b>(0.00,0.40)</b> | 0.63        | (0.58,0.67)        |
| <b>HDL</b>                 | All    | 0.66        | (0.61,0.69)        | 0.00        | (0.00,0.04)        | 0.58        | (0.44,0.68)        | 0.09        | (0.00,0.23)        | <b>0.66</b> | <b>(0.63,0.69)</b> |
|                            | Male   | 0.60        | (0.44,0.68)        | 0.05        | (0.00,0.18)        | 0.65        | (0.44,0.69)        | 0.00        | (0.00,0.21)        | <b>0.65</b> | <b>(0.60,0.69)</b> |
|                            | Female | 0.67        | (0.56,0.71)        | 0.00        | (0.00,0.10)        | 0.63        | (0.39,0.71)        | 0.04        | (0.00,0.29)        | <b>0.67</b> | <b>(0.63,0.71)</b> |
| <b>Apolipoprotein A1</b>   | All    | 0.64        | (0.55,0.68)        | 0.02        | (0.00,0.08)        | 0.66        | (0.55,0.68)        | 0.00        | (0.00,0.11)        | <b>0.66</b> | <b>(0.63,0.68)</b> |
|                            | Male   | 0.55        | (0.40,0.67)        | 0.07        | (0.00,0.20)        | 0.63        | (0.46,0.67)        | 0.00        | (0.00,0.17)        | <b>0.63</b> | <b>(0.59,0.67)</b> |
|                            | Female | 0.60        | (0.47,0.71)        | 0.07        | (0.00,0.18)        | 0.68        | (0.55,0.71)        | 0.00        | (0.00,0.13)        | <b>0.68</b> | <b>(0.64,0.71)</b> |
| <b>Immunoglobulin A</b>    | All    | <b>0.40</b> | <b>(0.29,0.51)</b> | <b>0.07</b> | <b>(0.00,0.15)</b> | 0.50        | (0.43,0.54)        | 0.00        | (0.00,0.07)        | 0.50        | (0.46,0.54)        |
|                            | Male   | <b>0.13</b> | <b>(0.00,0.32)</b> | <b>0.26</b> | <b>(0.11,0.39)</b> | 0.43        | (0.33,0.48)        | 0.00        | (0.00,0.09)        | 0.43        | (0.37,0.48)        |
|                            | Female | <b>0.59</b> | <b>(0.47,0.64)</b> | <b>0.00</b> | <b>(0.00,0.10)</b> | 0.52        | (0.27,0.63)        | 0.07        | (0.00,0.34)        | 0.59        | (0.53,0.64)        |
| <b>Height</b>              | All    | <b>0.77</b> | <b>(0.71,0.83)</b> | <b>0.09</b> | <b>(0.04,0.15)</b> | 0.87        | (0.83,0.88)        | 0.00        | (0.00,0.03)        | 0.87        | (0.85,0.88)        |
|                            | Male   | <b>0.72</b> | <b>(0.62,0.84)</b> | <b>0.14</b> | <b>(0.03,0.24)</b> | 0.86        | (0.77,0.88)        | 0.00        | (0.00,0.09)        | 0.86        | (0.85,0.88)        |
|                            | Female | <b>0.75</b> | <b>(0.65,0.86)</b> | <b>0.12</b> | <b>(0.01,0.21)</b> | 0.87        | (0.78,0.89)        | 0.00        | (0.00,0.09)        | 0.87        | (0.85,0.89)        |

The values in bold black are the estimates from the best fitting model.

**Table S8. Model fitting for sex-limitation structural equation model**

| Trait | Model <sup>a</sup> | EP <sup>b</sup> | minus 2LL <sup>c</sup> | Df <sup>d</sup> | AIC <sup>e</sup> | diff LL <sup>f</sup> | diff df <sup>g</sup> | p <sup>h</sup> |
|-------|--------------------|-----------------|------------------------|-----------------|------------------|----------------------|----------------------|----------------|
| TC    | ACE                | 17              | 21580.91               | 7723            | 6134.914         | NA                   | NA                   | NA             |
|       | ADE                | 17              | 21577.63               | 7723            | 6131.626         | -3.29                | 0                    | 1              |
|       | <b>AE</b>          | <b>15</b>       | <b>21580.92</b>        | <b>7725</b>     | <b>6130.918</b>  | <b>0.00</b>          | <b>2</b>             | <b>1</b>       |
| LDL   | ACE                | 17              | 21263.85               | 7622            | 6019.847         | NA                   | NA                   | NA             |
|       | <b>ADE</b>         | <b>17</b>       | <b>21257.72</b>        | <b>7622</b>     | <b>6013.719</b>  | <b>-6.13</b>         | <b>0</b>             | <b>1</b>       |
|       | AE                 | 15              | 21263.85               | 7624            | 6015.847         | 0.00                 | 2                    | 1              |
| ApoB  | ACE                | 17              | 21396.60               | 7721            | 5954.595         | NA                   | NA                   | NA             |
|       | ADE                | 17              | 21394.70               | 7721            | 5952.696         | -1.90                | 0                    | 1              |
|       | <b>AE</b>          | <b>15</b>       | <b>21396.95</b>        | <b>7723</b>     | <b>5950.949</b>  | <b>0.35</b>          | <b>2</b>             | <b>0.84</b>    |
| TG    | ACE                | 17              | 21055.15               | 7722            | 5611.154         | NA                   | NA                   | NA             |
|       | ADE                | 17              | 21054.26               | 7722            | 5610.256         | -0.90                | 0                    | 1              |
|       | <b>AE</b>          | <b>15</b>       | <b>21055.15</b>        | <b>7724</b>     | <b>5607.154</b>  | <b>0.00</b>          | <b>2</b>             | <b>1</b>       |
| CRP   | ACE                | 17              | 21488.40               | 7721            | 6046.404         | NA                   | NA                   | NA             |
|       | ADE                | 17              | 21487.23               | 7721            | 6045.231         | -1.17                | 0                    | 1              |
|       | <b>AE</b>          | <b>15</b>       | <b>21488.40</b>        | <b>7723</b>     | <b>6042.404</b>  | <b>0.00</b>          | <b>2</b>             | <b>1</b>       |
| Glu   | ACE                | 17              | 21345.34               | 7719            | 5907.342         | NA                   | NA                   | NA             |
|       | <b>ADE</b>         | <b>17</b>       | <b>21341.11</b>        | <b>7719</b>     | <b>5903.110</b>  | <b>-4.23</b>         | <b>0</b>             | <b>1</b>       |
|       | AE                 | 15              | 21345.34               | 7721            | 5903.342         | 0.00                 | 2                    | 1              |
| HbA1c | ACE                | 17              | 20747.08               | 7710            | 5327.083         | NA                   | NA                   | NA             |
|       | <b>ADE</b>         | <b>17</b>       | <b>20730.82</b>        | <b>7710</b>     | <b>5310.823</b>  | <b>-16.26</b>        | <b>0</b>             | <b>1</b>       |
|       | AE                 | 15              | 20747.08               | 7712            | 5323.083         | 0.00                 | 2                    | 1              |
| HB    | ACE                | 17              | 21190.62               | 7709            | 5772.621         | NA                   | NA                   | NA             |
|       | ADE                | 17              | 21189.98               | 7709            | 5771.978         | -0.64                | 0                    | 1              |
|       | <b>AE</b>          | <b>15</b>       | <b>21190.97</b>        | <b>7711</b>     | <b>5768.968</b>  | <b>0.35</b>          | <b>2</b>             | <b>0.84</b>    |
| CysC  | ACE                | 17              | 20468.89               | 7517            | 5434.887         | NA                   | NA                   | NA             |
|       | <b>ADE</b>         | <b>17</b>       | <b>20463.73</b>        | <b>7517</b>     | <b>5429.728</b>  | <b>-5.16</b>         | <b>0</b>             | <b>1</b>       |
|       | AE                 | 15              | 20468.89               | 7519            | 5430.887         | 0.00                 | 2                    | 1              |
| Crea  | ACE                | 17              | 20505.86               | 7517            | 5471.856         | NA                   | NA                   | NA             |
|       | <b>ADE</b>         | <b>17</b>       | <b>20499.42</b>        | <b>7517</b>     | <b>5465.422</b>  | <b>-6.43</b>         | <b>0</b>             | <b>1</b>       |
|       | AE                 | 15              | 20509.35               | 7519            | 5471.350         | 3.49                 | 2                    | 0.17           |
| GFR   | ACE                | 17              | 20580.29               | 7517            | 5546.288         | NA                   | NA                   | NA             |
|       | <b>ADE</b>         | <b>17</b>       | <b>20571.89</b>        | <b>7517</b>     | <b>5537.887</b>  | <b>-8.40</b>         | <b>0</b>             | <b>1</b>       |
|       | AE                 | 15              | 20580.29               | 7519            | 5542.288         | 0.00                 | 2                    | 1              |
| BMI   | ACE                | 17              | 20782.26               | 7662            | 5458.262         | NA                   | NA                   | NA             |
|       | <b>ADE</b>         | <b>17</b>       | <b>20777.22</b>        | <b>7662</b>     | <b>5453.224</b>  | <b>-5.04</b>         | <b>0</b>             | <b>1</b>       |
|       | AE                 | 15              | 20782.26               | 7664            | 5454.262         | 0.00                 | 2                    | 1              |
| WT    | ACE                | 17              | 20697.38               | 7667            | 5363.382         | NA                   | NA                   | NA             |
|       | ADE                | 17              | 20696.19               | 7667            | 5362.193         | -1.19                | 0                    | 1              |
|       | <b>AE</b>          | <b>15</b>       | <b>20697.38</b>        | <b>7669</b>     | <b>5359.382</b>  | <b>0.00</b>          | <b>2</b>             | <b>1</b>       |
| WC    | ACE                | 17              | 20979.99               | 7654            | 5671.987         | NA                   | NA                   | NA             |
|       | <b>ADE</b>         | <b>17</b>       | <b>20974.49</b>        | <b>7654</b>     | <b>5666.491</b>  | <b>-5.50</b>         | <b>0</b>             | <b>1</b>       |
|       | AE                 | 15              | 20979.99               | 7656            | 5667.987         | 0                    | 2                    | 1              |

|               |            |           |                 |             |                 |             |           |             |
|---------------|------------|-----------|-----------------|-------------|-----------------|-------------|-----------|-------------|
| <b>HDL</b>    | ACE        | 17        | 20813.13        | 7723        | 5367.129        | NA          | NA        | NA          |
|               | ADE        | 17        | 20813.46        | 7723        | 5367.459        | 0.33        | 0         | 0           |
|               | <b>AE</b>  | <b>15</b> | <b>20813.57</b> | <b>7725</b> | <b>5363.575</b> | <b>0.45</b> | <b>2</b>  | <b>0.80</b> |
| <b>ApoA1</b>  | ACE        | 17        | 20986.29        | 7721        | 5544.293        | NA          | NA        | NA          |
|               | ADE        | 17        | 20988.84        | 7721        | 5546.838        | 2.55        | 0         | 0           |
|               | <b>AE</b>  | <b>15</b> | <b>20988.84</b> | <b>7723</b> | <b>5542.838</b> | <b>2.55</b> | <b>2</b>  | <b>0.28</b> |
| <b>IgA</b>    | <b>ACE</b> | <b>17</b> | <b>21088.02</b> | <b>7674</b> | <b>5740.018</b> | <b>NA</b>   | <b>NA</b> | <b>NA</b>   |
|               | ADE        | 17        | 21098.33        | 7674        | 5750.325        | 10.31       | 0         | 0           |
|               | AE         | 15        | 21098.64        | 7676        | 5746.638        | 10.62       | 2         | 0.00        |
| <b>Height</b> | <b>ACE</b> | <b>17</b> | <b>19551.80</b> | <b>7668</b> | <b>4215.802</b> | <b>NA</b>   | <b>NA</b> | <b>NA</b>   |
|               | ADE        | 17        | 19562.34        | 7668        | 4226.342        | 10.54       | 0         | 0           |
|               | AE         | 15        | 19562.34        | 7670        | 4222.342        | 10.54       | 2         | 0.01        |

<sup>a</sup> The model in bold is the best fitted model according to Akaike information criterion;

<sup>b</sup> EP: number of estimated parameters;

<sup>c</sup> minus 2LL: minus 2 log likelihood;

<sup>d</sup> df: degree of freedom;

<sup>e</sup> AIC: Akaike information criterion;

<sup>f</sup> diff LL: difference of log likelihood;

<sup>g</sup> diff df: difference of df;

<sup>h</sup> P: P value.

**Table S9. Distributions of the contact frequency and separation age by zygosity and sex**

|                          | MZ    |       |        | SSDZ  |       |        | OSDZ  |
|--------------------------|-------|-------|--------|-------|-------|--------|-------|
|                          | All   | Male  | Female | All   | Male  | Female |       |
| <b>Contact frequency</b> |       |       |        |       |       |        |       |
| $n_{\text{pair}}$        | 1066  | 549   | 517    | 1424  | 596   | 828    | 1325  |
| Mean                     | 3.03  | 3.04  | 3.03   | 2.71  | 2.64  | 2.76   | 2.45  |
| Standard Deviation       | 0.82  | 0.82  | 0.81   | 0.82  | 0.81  | 0.82   | 0.69  |
| <b>Separation age</b>    |       |       |        |       |       |        |       |
| $n_{\text{pair}}$        | 1027  | 518   | 509    | 1393  | 579   | 814    | 1302  |
| Mean                     | 19.80 | 20.29 | 19.30  | 18.55 | 19.30 | 18.02  | 18.25 |
| Standard Deviation       | 3.43  | 3.59  | 3.20   | 3.59  | 3.76  | 3.37   | 3.75  |

Contact frequency was defined by the replies to questions about how often the participants usually met with their co-twin, and it was divided into four levels: 1-less than once a year; 2-on a yearly basis; 3-on a monthly basis; or 4-on a weekly basis; the measure here is used as a continuous variable. Contact frequency and separation age are significantly different between monozygotic (MZ) and same-sex dizygotic (SSDZ) twins ( $P < 0.001$ ), MZ and opposite-sex dizygotic (OSDZ) twins ( $P < 0.001$ ), SSDZ and OSDZ ( $P < 0.05$ ); Contact frequency is not significantly different between males and females in MZ ( $P = 0.94$ ), but significantly in SSDZ ( $P = 0.007$ ); separation ages are significantly different between males and females both in MZ and in SSDZ ( $P < 0.001$ ); Contact frequency and separation age are both significantly different between males of MZ and SSDZ ( $P < 0.001$ ), and females of MZ and SSDZ ( $P < 0.001$ ).

**Table S10. Intra-pair correlation stratified by level of shared environment in monozygotic twins**

| Trait                       | 1) Contact frequency <sup>a</sup> |                   |                   |                   | 2) Separation age <sup>b</sup> |                   |                   |                   |
|-----------------------------|-----------------------------------|-------------------|-------------------|-------------------|--------------------------------|-------------------|-------------------|-------------------|
|                             | r <sub>Low</sub>                  | n <sub>pair</sub> | r <sub>High</sub> | n <sub>pair</sub> | r <sub>Low</sub>               | n <sub>pair</sub> | r <sub>High</sub> | n <sub>pair</sub> |
| Total cholesterol           | 0.461                             | 619               | 0.482             | 447               | 0.497                          | 530               | 0.440             | 497               |
| High density lipoprotein    | 0.657                             | 619               | 0.690             | 447               | 0.658                          | 530               | 0.690             | 497               |
| Low density lipoprotein     | 0.442                             | 610               | 0.479             | 434               | 0.484                          | 523               | 0.430             | 484               |
| Apolipoprotein A1           | 0.625                             | 618               | 0.677             | 447               | 0.647                          | 529               | 0.663             | 497               |
| Apolipoprotein B            | 0.504                             | 618               | 0.542             | 447               | 0.521                          | 529               | 0.521             | 497               |
| Triglyceride                | 0.547                             | 619               | 0.575             | 447               | 0.484                          | 530               | 0.613             | 497               |
| C-reactive protein          | 0.384                             | 619               | 0.471             | 446               | 0.458                          | 529               | 0.389             | 497               |
| Glucose                     | 0.512                             | 619               | 0.501             | 447               | 0.487                          | 530               | 0.516             | 497               |
| Glycosylated hemoglobin A1c | 0.644                             | 618               | 0.750             | 447               | 0.657                          | 529               | 0.737             | 497               |
| Hemoglobin                  | 0.543                             | 616               | 0.539             | 447               | 0.537                          | 528               | 0.559             | 496               |
| Cystatin C                  | 0.530                             | 600               | 0.635             | 429               | 0.546                          | 514               | 0.596             | 479               |
| Creatinine                  | 0.541                             | 600               | 0.630             | 429               | 0.567                          | 514               | 0.606             | 479               |
| Glomerular filtration rate  | 0.533                             | 600               | 0.623             | 429               | 0.544                          | 514               | 0.588             | 479               |
| Immunoglobulin A            | 0.447                             | 614               | 0.402             | 444               | 0.474                          | 529               | 0.395             | 491               |
| Body mass index             | 0.641                             | 614               | 0.727             | 447               | 0.647                          | 527               | 0.708             | 495               |
| Weight                      | 0.676                             | 617               | 0.794             | 447               | 0.700                          | 529               | 0.753             | 496               |
| Waist circumference         | 0.602                             | 619               | 0.689             | 444               | 0.620                          | 528               | 0.645             | 496               |
| Height                      | 0.846                             | 616               | 0.882             | 447               | 0.820                          | 528               | 0.906             | 496               |

<sup>a</sup> Low contact frequency was defined as  $\leq 3$  (on the monthly basis), high contact frequency was defined as  $> 3$ ; contact frequency in low group (mean=2.43, standard deviation=0.48) was significantly lower than high group (mean=3.88, standard deviation=0.22),  $P < 0.0001$ ; r is the intra-pair correlation coefficient, all of them were significant ( $P < 0.0001$ );

<sup>b</sup> Low separation age was defined as  $\leq 19.5$  years old (median age), while high separation age was defined as  $> 19.5$  years old; separation age in low group (mean=17.46, standard deviation=2.23) was significantly younger than high group (mean=22.30, standard deviation=2.63),  $P < 0.0001$ ; r is the intra-pair correlation coefficient, all of them were significant ( $P < 0.0001$ ).
